# Supplementary material for: Processes determining the marine alkalinity and calcium carbonate saturation state distributions
Source: Copernicus journal article supplement (doi:10.5194/bg-11-7349-2014), 2014-12-19
Supplement: Supplementary file 1 [file bg-11-7349-2014-supplement.zip]

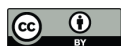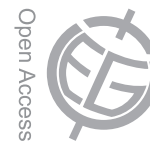

## *Supplement of*

# **Processes determining the marine alkalinity and calcium carbonate saturation state distributions**

**B. R. Carter et al.**

*Correspondence to:* B. R. Carter ([brcarter@princeton.edu](mailto:brcarter@princeton.edu))

- [bg-11-7349-2014-supplement-cover-letter.pdf](#)
- Plain Text Supplementary Materials SD. River Discharges.txt
- Supplementary Materials Documents SA, SB, SC, SE post reviews.pdf
- Supplementary Materials SD. River Discharges.xlsx
