# Supplementary material for: Processes determining the marine alkalinity and calcium carbonate saturation state distributions
Source: Copernicus journal article supplement (doi:10.5194/bg-11-7349-2014), 2014-12-19
Supplement: Supplementary file 1 [file Supplementary Materials SD. River Discharges.xlsx]

## Sheet: River Discharges
Number	River Name	Annual discharge volume	Longitude	Latitude	Alkalinity, Cai et al. [2008]	Annual riverine alkalinity flux	Northern Pacific	Southern Pacific	Indian	Arctic	Northern Atlantic	Southern Atlantic	Southern Ocean
		km^3 yr ^-1	°E	°N	µmol kg^-1	mol yr^-1
1	Amazon	6642	-56	-2	369	2450898000000	0	0	0	0	0	2450898000000	0
2	Congo	1308	15	-4	224	292992000000	0	0	0	0	0	292992000000	0
3	Orinoco	1129	-64	8	423	477567000000	0	0	0	0	477567000000	0	0
4	Changjiang	944	118	31	1780	1680320000000	1680320000000	0	0	0	0	0	0
5	Brahmaputra	628	90	25	1114	699592000000	0	0	699592000000	0	0	0	0
6	Mississippi	610	-91	32	2074	1265140000000	0	0	0	0	1265140000000	0	0
7	Yenisey	599	87	67	905	542095000000	0	0	0	542095000000	0	0	0
8	Parana´	568	-61	-33	764	433952000000	0	0	0	0	0	433952000000	0
9	Lena	531	127	71	870	461970000000	0	0	0	461970000000	0	0	0
10	Mekong	525	106	15	949	498225000000	498225000000	0	0	0	0	0	0
11	Tocantins	511	-50	-4		562100000000	0	0	0	0	0	562100000000	0
12	Tapajos	415	-57	-5		456500000000	0	0	0	0	0	456500000000	0
13	Ob	412	67	67	1251	515412000000	0	0	0	515412000000	0	0	0
14	Ganges	404	88	25	1966	794264000000	0	0	794264000000	0	0	0	0
15	Irrawaddy	393	96	22		432300000000	0	0	432300000000	0	0	0	0
16	St. Lawrence	363	-75	45	1339	486057000000	0	0	0	486057000000	0	0	0
17	Amur	354	137	51	1535	543390000000	543390000000	0	0	0	0	0	0
18	Xingu	302	-52	-3		332200000000	0	0	0	0	0	332200000000	0
19	Mackenzie	290	-134	68	1938	562020000000	0	0	0	562020000000	0	0	0
20	Xijiang	270	111	24	1800	486000000000	486000000000	0	0	0	0	0	0
21	Columbia	252	-121	46	1246	313992000000	313992000000	0	0	0	0	0	0
22	Magdalena	231	-75	10		254100000000	0	0	0	0	254100000000	0	0
23	Uruguay	228	-59	-31	317	72276000000	0	0	0	0	0	72276000000	0
24	Yukon	212	-163	62	1363	288956000000	288956000000	0	0	0	0	0	0
25	Atrato	204	-77	6		224400000000	224400000000	0	0	0	0	0	0
26	Danube	202	29	45	3115	629230000000	0	0	0	0	629230000000	0	0
27	Niger	193	4	12	550	106150000000	0	0	0	0	106150000000	0	0
28	Ogooue´	186	10	-1		204600000000	0	0	0	0	0	204600000000	0
29	Essequibo	154	-59	6		169400000000	0	0	0	0	169400000000	0	0
30	Fraser	144	-121	49		158400000000	158400000000	0	0	0	0	0	0
31	Pechora	140	52	68		154000000000	0	0	0	154000000000	0	0	0
32	Nelson	126	98	55		138600000000	0	0	0	138600000000	0	0	0
33	Khatanga	124	103	72		136400000000	0	0	0	136400000000	0	0	0
34	Sepik	123	142	-4		135300000000	0	135300000000	0	0	0	0	0
35	Kolyma	118	159	69	467	55106000000	0	0	0	55106000000	0	0	0
36	Zambeze	117	34	-16		128700000000	0	0	128700000000	0	0	0	0
37	Severnaya Dvina	112	42	64		123200000000	0	0	0	123200000000	0	0	0
38	Indus	104	68	25	1681	174824000000	0	0	174824000000	0	0	0	0
39	Sanaga	99	10	4		108900000000	0	0	0	0	108900000000	0	0
40	Godavari	97	82	17	2156	209132000000	0	0	209132000000	0	0	0	0
41	Rajang	93	113	2		102300000000	102300000000	0	0	0	0	0	0
42	Sao Francisco	90	-37	-10		99000000000	0	0	0	0	0	99000000000	0
43	Usumacinta	89	-92	17		97900000000	0	0	0	0	97900000000	0	0
44	Maroni	86	-55	5		94600000000	0	0	0	0	94600000000	0	0
45	Rhine	75	6	52		82500000000	0	0	0	82500000000	0	0	0
46	Purari	74	145	-7		81400000000	0	81400000000	0	0	0	0	0
47	Caniapiscau	73	-69	57		80300000000	0	0	0	80300000000	0	0	0
48	Mahanadi	73	84	21		80300000000	0	0	80300000000	0	0	0	0
49	Sacramento	69	-122	39		75900000000	75900000000	0	0	0	0	0	0
50	Jacui	69	-52	-30		75900000000	0	0	0	0	0	75900000000	0
51	San Juan	65	-77	4		71500000000	71500000000	0	0	0	0	0	0
52	Be´noue´	64	13	9		70400000000	0	0	0	0	70400000000	0	0
53	Kuskokwim	57	-158	62		62700000000	62700000000	0	0	0	0	0	0
54	Albany	57	-84	51		62700000000	0	0	0	62700000000	0	0	0
55	Huai	57	117	33		62700000000	62700000000	0	0	0	0	0	0
56	La Grande	56	-79	54		61600000000	0	0	0	61600000000	0	0	0
57	Tigris	56	44	33		61600000000	0	0	0	0	61600000000	0	0
58	Krishna	55	81	17		60500000000	0	0	60500000000	0	0	0	0
59	Ottawa	55	-76	46		60500000000	0	0	0	60500000000	0	0	0
60	Chindwin	55	96	26		60500000000	0	0	60500000000	0	0	0	0
61	Taz	55	82	67		60500000000	0	0	0	60500000000	0	0	0
62	Po	55	12	45		60500000000	0	0	0	0	60500000000	0	0
63	Courantyne	54	-58	5		59400000000	0	0	0	0	59400000000	0	0
64	Indigirka	54	148	70		59400000000	0	0	0	59400000000	0	0	0
65	Rhone	54	5	44		59400000000	0	0	0	59400000000	0	0	0
66	Saguenay	53	-72	49		58300000000	0	0	0	58300000000	0	0	0
67	Alabama	51	-88	32		56100000000	0	0	0	0	56100000000	0	0
68	Stikine	51	-132	57		56100000000	56100000000	0	0	0	0	0	0
69	Eastmain	49	-78	52		53900000000	0	0	0	53900000000	0	0	0
70	Brahmani	48	85	22		52800000000	0	0	52800000000	0	0	0	0
71	Dnepr	47	35	48		51700000000	0	0	0	0	51700000000	0	0
72	Huanghe	47	115	35	2591	121777000000	121777000000	0	0	0	0	0	0
73	Jamanxim	47	-56	-6		51700000000	0	0	0	0	0	51700000000	0
74	Susquehanna	46	-77	40		50600000000	0	0	0	50600000000	0	0	0
75	Beijiang	46	113	24		50600000000	50600000000	0	0	0	0	0	0
76	Don	45	41	48		49500000000	0	0	0	0	49500000000	0	0
77	Susitna	45	-151	7		49500000000	49500000000	0	0	0	0	0	0
78	Narmada	44	74	22		48400000000	0	0	48400000000	0	0	0	0
79	Santa Cruz	41	-72	-50		45100000000	0	0	0	0	0	0	45100000000
80	Oyapock	40	-52	4		44000000000	0	0	0	0	44000000000	0	0
81	George	40	-66	58		44000000000	0	0	0	44000000000	0	0	0
82	Rufiji	40	40	-8		44000000000	0	0	44000000000	0	0	0	0
83	Nile	40	31	30		44000000000	0	0	0	0	44000000000	0	0
84	Nottaway	39	-77	50		42900000000	0	0	0	42900000000	0	0	0
85	Volta	37	0	6		40700000000	0	0	0	0	40700000000	0	0
86	Willamette	37	-123	45		40700000000	40700000000	0	0	0	0	0	0
87	Skeena	36	-128	55		39600000000	39600000000	0	0	0	0	0	0
88	Garonne	36	0	44		39600000000	0	0	0	39600000000	0	0	0
89	Red	36	-92	31		39600000000	0	0	0	0	39600000000	0	0
90	Pahang	35	102	3		38500000000	0	0	38500000000	0	0	0	0
91	Moose	34	-81	51		37400000000	0	0	0	37400000000	0	0	0
92	Chao Phraya	34	100	15		37400000000	0	0	37400000000	0	0	0	0
93	Cuyuni	34	-59	6		37400000000	0	0	0	0	37400000000	0	0
94	Vistula	34	19	54		37400000000	0	0	0	37400000000	0	0	0
95	Copper	34	145	62		37400000000	37400000000	0	0	0	0	0	0
96	Saint John	34	-67	46		37400000000	0	0	0	37400000000	0	0	0
97	Olenek	34	124	72		37400000000	0	0	0	37400000000	0	0	0
98	Rupert	33	-77	52		36300000000	0	0	0	36300000000	0	0	0
99	Vuoksi	33	29	61		36300000000	0	0	0	36300000000	0	0	0
100	Kamchatka	33	162	56		36300000000	36300000000	0	0	0	0	0	0
101	Manicouagan	33	-68	49		36300000000	0	0	0	36300000000	0	0	0
102	Esmeraldas	32	-79	1		35200000000	35200000000	0	0	0	0	0	0
103	Doce	32	-40	-19		35200000000	0	0	0	0	0	35200000000	0
104	Yana	32	136	71		35200000000	0	0	0	35200000000	0	0	0
105	Jari	32	-53	-1		35200000000	0	0	0	0	0	35200000000	0
106	Bı´o Bı´o	32	-73	-37		35200000000	0	35200000000	0	0	0	0	0
107	Severn	32	-88	55		35200000000	0	0	0	35200000000	0	0	0
108	Nushagak	31	-158	59		34100000000	34100000000	0	0	0	0	0	0
109	Tsiribihina	31	45	-20		34100000000	0	0	34100000000	0	0	0	0
110	Baker	30	-73	-47		33000000000	0	0	0	0	0	0	33000000000
111	Araguari	30	-51	1		33000000000	0	0	0	0	33000000000	0	0
112	Pur	29	78	67		31900000000	0	0	0	31900000000	0	0	0
113	Nass	29	-129	55		31900000000	31900000000	0	0	0	0	0	0
114	Douro	29	-8	41		31900000000	0	0	0	31900000000	0	0	0
115	Negro	29	-64	-41		31900000000	0	0	0	0	0	0	31900000000
116	Kouilou	29	12	-4		31900000000	0	0	0	0	0	31900000000	0
117	Loire	28	-1	47		30800000000	0	0	0	30800000000	0	0	0
118	Puelo	28	-73	-42		30800000000	0	0	0	0	0	0	30800000000
119	Dongjiang	27	114	23		29700000000	29700000000	0	0	0	0	0	0
120	Tista	27	90	26		29700000000	0	0	29700000000	0	0	0	0
121	Elbe	27	12	53		29700000000	0	0	0	29700000000	0	0	0
122	Alsek	27	-138	59		29700000000	29700000000	0	0	0	0	0	0
123	Tombigbee	27	-88	33		29700000000	0	0	0	0	29700000000	0	0
124	Paraiba do S	26	-41	-22		28600000000	0	0	0	0	0	28600000000	0
125	Parnaiba	26	-42	-4		28600000000	0	0	0	0	0	28600000000	0
126	Karun	25	49	31		27500000000	0	0	0	0	27500000000	0	0
127	Curua-2	25	-55	-6		27500000000	0	0	0	0	0	27500000000	0
128	Mezen	25	46	65		27500000000	0	0	0	27500000000	0	0	0
129	Kinabatangan	25	118	5		27500000000	27500000000	0	0	0	0	0	0
130	Saint-Maurice	24	-73	47		26400000000	0	0	0	26400000000	0	0	0
131	Nyanga	23	11	-3		25300000000	0	0	0	0	0	25300000000	0
132	Capim	23	-48	-3		25300000000	0	0	0	0	0	25300000000	0
133	Grijalva	22	-93	18		24200000000	0	0	0	0	24200000000	0	0
134	Senegal	22	-16	17		24200000000	0	0	0	0	24200000000	0	0
135	Papaloapan	22	-96	18		24200000000	0	0	0	0	24200000000	0	0
136	Euphrates	21	44	33		23100000000	0	0	0	0	23100000000	0	0
137	Glomma	21	11	60		23100000000	0	0	0	23100000000	0	0	0
138	Apalachicola	20	-85	31		22000000000	0	0	0	0	22000000000	0	0
139	Nadym	20	-73	66		22000000000	0	0	0	22000000000	0	0	0
140	Odra	20	14	53		22000000000	0	0	0	22000000000	0	0	0
141	Daugava	19	26	57		20900000000	0	0	0	20900000000	0	0	0
142	Hayes, MB	19	-93	56		20900000000	0	0	0	20900000000	0	0	0
143	Baleine	19	-77	55		20900000000	0	0	0	20900000000	0	0	0
144	Mangoky	19	44	-22		20900000000	0	0	20900000000	0	0	0	0
145	Feuilles	19	-70	29		20900000000	0	0	0	0	20900000000	0	0
146	Melezes	19	-70	58		20900000000	0	0	0	20900000000	0	0	0
147	Churchill	18	-95	58		19800000000	0	0	0	19800000000	0	0	0
148	Kelantan	18	102	6		19800000000	0	0	19800000000	0	0	0	0
149	Clutha	17	170	-46		18700000000	0	0	0	0	0	0	18700000000
150	Cross	17	9	6		18700000000	0	0	0	0	18700000000	0	0
151	Kemi	17	25	66		18700000000	0	0	0	18700000000	0	0	0
152	Go¨ta	17	12	58		18700000000	0	0	0	18700000000	0	0	0
153	Han	17	127	38		18700000000	18700000000	0	0	0	0	0	0
154	Back	17	-97	66		18700000000	0	0	0	18700000000	0	0	0
155	Onega	16	39	64		17600000000	0	0	0	17600000000	0	0	0
156	Tapi	16	73	21		17600000000	0	0	17600000000	0	0	0	0
157	Anabar	16	114	72		17600000000	0	0	0	17600000000	0	0	0
158	Jequitinhonh	14	-40	-16		15400000000	0	0	0	0	0	15400000000	0
159	Kuban	14	38	45		15400000000	0	0	0	0	15400000000	0	0
160	Pa´nuco	14	-98	22		15400000000	0	0	0	0	15400000000	0	0
161	Limpopo	14	33	-25		15400000000	0	0	15400000000	0	0	0	0
162	Winisk	13	-87	55		14300000000	0	0	0	14300000000	0	0	0
163	Ebro	13	1	41		14300000000	0	0	0	14300000000	0	0	0
164	Narva	12	28	59		13200000000	0	0	0	13200000000	0	0	0
165	Colorado	12	-115	33		13200000000	13200000000	0	0	0	0	0	0
166	Seine	11	1	49		12100000000	0	0	0	12100000000	0	0	0
167	Coopermine	11	-115	68		12100000000	0	0	0	12100000000	0	0	0
168	Dnestr	11	30	47		12100000000	0	0	0	0	12100000000	0	0
169	Tagus	11	-8	340		12100000000	0	0	0	0	12100000000	0	0
170	Burdekin	10	147	-20		11000000000	0	11000000000	0	0	0	0	0
171	Itapecuru	10	-44	-4		11000000000	0	0	0	0	0	11000000000	0
172	Murray	9	143	-35		9900000000	0	9900000000	0	0	0	0	0
173	Bolshoy Anyu	8	161	68		8800000000	0	0	0	8800000000	0	0	0
174	Grande de Sa	8	-105	22		8800000000	8800000000	0	0	0	0	0	0
175	Bandama	8	-5	6		8800000000	0	0	0	0	8800000000	0	0
176	Cauvery	8	79	11		8800000000	0	0	8800000000	0	0	0	0
177	Juba	8	43	4		8800000000	0	0	8800000000	0	0	0	0
178	Fitzroy-QX	7	150	-23		7700000000	0	7700000000	0	0	0	0	0
179	Brazos	4	-96	30		4400000000	0	0	0	0	4400000000	0	0
180	Comoe´	7	-4	7		7700000000	0	0	0	0	7700000000	0	0
181	Jaguaribe	7	-38	-5		7700000000	0	0	0	0	0	7700000000	0
182	Daly	6	131	-14		6600000000	0	6600000000	0	0	0	0	0
183	Oue´me´	5	3	7		5500000000	0	0	0	0	5500000000	0	0
184	Guadiana	5	-8	38		5500000000	0	0	0	0	5500000000	0	0
185	Anderson	5	-128	69		5500000000	0	0	0	5500000000	0	0	0
186	Victoria	5	131	-16		5500000000	0	5500000000	0	0	0	0	0
187	Roper	5	134	-15		5500000000	0	5500000000	0	0	0	0	0
188	Liao	5	124	42		5500000000	5500000000	0	0	0	0	0	0
189	Orange	5	18	-29		5500000000	0	0	0	0	0	5500000000	0
190	Paraquacu	4	-39	-13		4400000000	0	0	0	0	0	4400000000	0
191	Contas [de]	3	-39	-14		3300000000	0	0	0	0	0	3300000000	0
192	Guadalquivir	3	-6	38		3300000000	0	0	0	0	3300000000	0	0
193	Yaqui	3	-110	29		3300000000	3300000000	0	0	0	0	0	0
194	Colorado	3	-96	29		3300000000	0	0	0	0	3300000000	0	0
195	Rio Grande	2	-97	26		2200000000	0	0	0	0	2200000000	0	0
196	de Grey	1	119	-20		1100000000	0	0	1100000000	0	0	0	0
197	Gascoyne	1	114	-25		1100000000	0	0	1100000000	0	0	0	0
198	Avon	1	116	-32		1100000000	0	0	1100000000	0	0	0	0
199	Fortescue	1	116	-21		1100000000	0	0	1100000000	0	0	0	0
200	Murchison	1	115	-28		1100000000	0	0	1100000000	0	0	0	0
Total		25098				23036137000000	5238360000000	298100000000	3021812000000	4840260000000	4161087000000	5317018000000	159500000000
							22.7398	1.29405	13.1177	21.0116	18.0633	23.0812	0.69239
						Atlantic	41.1445
						Arctic	21.0116
						Other	37.8439
